# Supplementary material
Source: HighWire-hosted journal article supplement (https://svn.bmj.com/content/8/2/151)
Supplement: inline-supplementary-material-2 [file inline-supplementary-material-2.pdf]

**ONLINE SUPPLEMENTARY DOCUMENT**

**Measures of intracranial compartments in acute intracerebral haemorrhage: data from the Rapid Intervention with Glyceryl Trinitrate in Hypertensive Stroke-2 Trial (RIGHT-2)**

**Supplemental Table I.** Comparison of intracranial volume and intracerebral haemorrhage volume measures on CT scans (n=133). Data are mean (standard deviation), difference ( $\Delta$ ) in volume.

| Measure                                      |                  | Difference ( $\Delta$ ) | p value  |
|----------------------------------------------|------------------|-------------------------|----------|
| Intracranial volume (ICV) (cm <sup>3</sup> ) |                  |                         |          |
| SAS                                          | 1419.64 (197.07) | 62.21                   | p<0.0001 |
| XYZ/2                                        | 1357.42 (219.97) |                         |          |
| Haemorrhage volume (ICHV) (cm <sup>3</sup> ) |                  |                         |          |
| SAS                                          | 46.07 (41.98)    | 0.07                    | 0.94     |
| ABC/2                                        | 45.99 (42.72)    |                         |          |

**Supplemental Table II.** Inter-observer comparison, ICC (n=10) for two observers of intracranial volume by semi-automated segmentation (cm<sup>3</sup>), cerebral parenchymal volume (cm<sup>3</sup>), cerebrospinal fluid volume (cm<sup>3</sup>), intracranial area (cm<sup>2</sup>), intercaudate distance (mm) and sylvian fissure ratio (mm). Data are mean (standard deviation) and mean difference ( $\Delta$ ).

|                             |                  |                  | Difference ( $\Delta$ ) | ICC  |
|-----------------------------|------------------|------------------|-------------------------|------|
| Observer                    | 1                | 2                |                         |      |
| Measure                     |                  |                  |                         |      |
| Intracranial volume         | 1340.80 (114.90) | 1341.00 (126.59) | -0.20 (21.55)           | 0.99 |
| Cerebral parenchymal volume | 1153.40 (143.84) | 1168.39 (121.92) | -14.99 (45.01)          | 0.92 |
| Cerebrospinal fluid volume  | 187.39 (180.45)  | 172.60 (148.65)  | 14.79 (40.90)           | 0.92 |
| Intercaduate distance       | 15.66 (4.40)     | 22.95 (9.88)     | -7.49 (5.48)            | 0.69 |
| Sylvian fissure ratio       | 0.05 (0.01)      | 0.05 (0.02)      | *                       | 0.72 |

**Supplemental Table III.** Intra-observer comparison, ICC for two observers (n=10), of intracranial volume by semi-automated segmentation (cm<sup>3</sup>), cerebral parenchymal volume (cm<sup>3</sup>), cerebrospinal fluid volume (cm<sup>3</sup>), intracranial area (cm<sup>2</sup>), intercaudate distance (mm) and sylvian fissure ratio (mm).

|                             |                     |                     | Difference<br>(Δ) | ICC  |                     |                     | Difference<br>(Δ) | ICC  |
|-----------------------------|---------------------|---------------------|-------------------|------|---------------------|---------------------|-------------------|------|
| Observer                    | 1                   |                     |                   |      | 2                   |                     |                   |      |
| Measure                     | 1                   | 2                   |                   |      | 1                   | 2                   |                   |      |
| Intracranial volume         | 1379.80<br>(124.90) | 1391.17<br>(143.98) | -12.17<br>(18.08) | 0.95 | 1393.50<br>(153.18) | 1394.20<br>(156.78) | -0.70<br>(12.34)  | 0.99 |
| Cerebral parenchymal volume | 1269<br>(189.91)    | 1251<br>(171.28)    | 18.00<br>(18.73)  | 0.92 | 1212.79<br>(177.65) | 1244.51<br>(175.70) | 31.72<br>(46.65)  | 0.98 |
| Cerebrospinal fluid volume  | 181.39<br>(80.41)   | 183.65<br>(84.29)   | -2.06<br>(3.38)   | 0.92 | 180.71<br>(83.15)   | 149.69<br>(71.25)   | 31.02<br>(49.48)  | 0.88 |
| Intercaudate distance       | 18.29<br>(3.73)     | 17.26<br>(2.19)     | 1.03<br>(1.53)    | 0.83 | 17.96<br>(4.78)     | 18.31<br>(5.54)     | -0.35<br>(2.26)   | 0.95 |
| Sylvian fissure ratio       | 0.06<br>(0.01)      | 0.05<br>(0.04)      | 0.01              | 0.73 | 0.06<br>(0.02)      | 0.06<br>(0.02)      | 0.00              | 0.92 |

**Supplemental Table IV.** Intra and inter-observer comparisons (ICC) of visual assessment of small vessel disease using the Van Swieten score and severity of hydrocephalus using the cistern score.

| Observer          | ICC  |      |        |
|-------------------|------|------|--------|
|                   | 1    | 2    | 1 vs 2 |
| van Swieten score | 0.83 | 0.95 | 0.98   |
| Cistern score     | 0.96 | 1.00 | 0.94   |

**Supplemental Figure I.** Bland-Altman plot for assessment of variation in estimating intracranial volume between XYZ/2 and semi-automated segmentation methods (n=133) ( $r^2=0.78$ ,  $p<0.0001$ ). The continuous and dotted lines represent the regression lines. The slope of the best-fit regression line was 0.12 ( $p=0.042$ ). Mean intracranial volume was 1419.64 (197.07) mL by SAS and 1357.42 (219.97) mL by XYZ/2 with a mean difference of 62.21 mL;  $p<0.001$

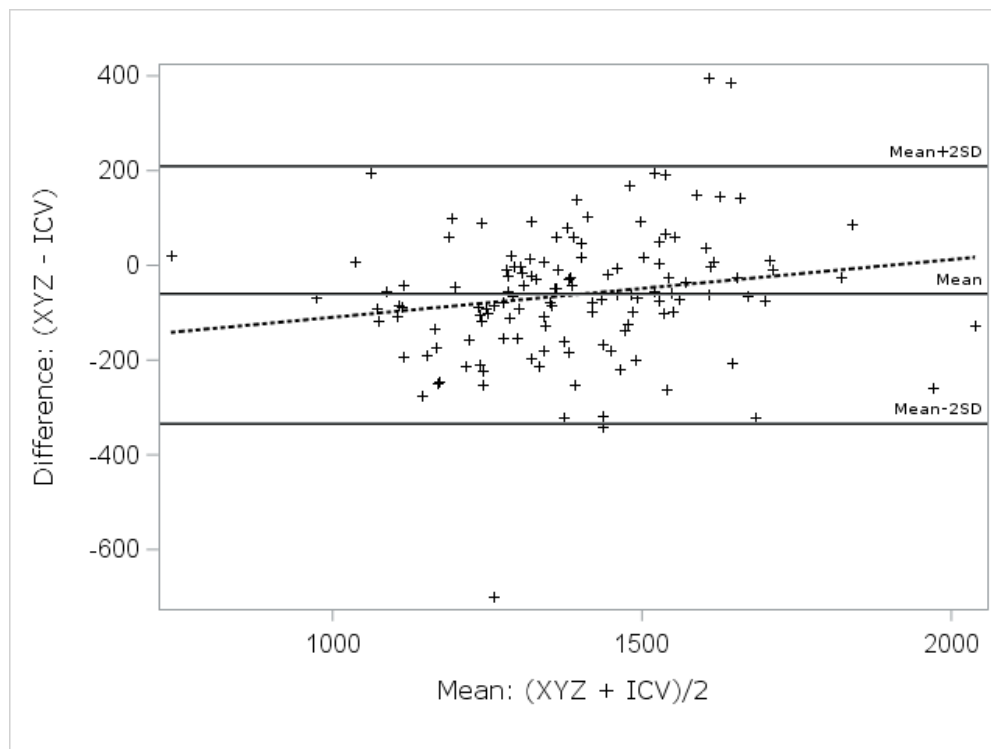

**Supplemental Figure II.** The Bland-Altman plot for assessment of variation in estimating intracerebral haemorrhage volume between ABC/2 and semi-automatic segmentation ( $r^2 = 0.97$ ,  $p < 0.0001$ ). The continuous and dotted lines represent the regression lines. The slope of the best-fit regression line was 0.018 ( $p = 0.42$ ). Mean intracerebral haemorrhage volume was 46.07 (41.98) mL by SAS and 45.99 (42.72) mL with mean difference of 0.07 mL;  $p = 0.94$ .

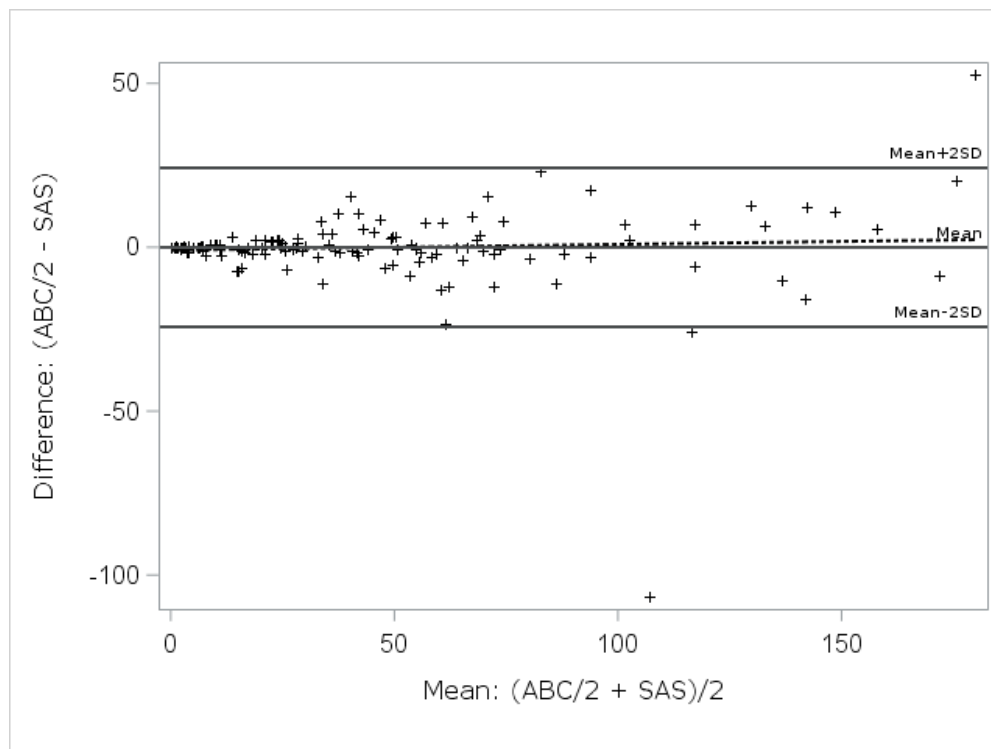

**Supplemental Figure III.** Regression line between ABC/XYZ (%) and ICH volume as a percentage of intracranial volume using semi-automated segmentation (SAS). The slope of the best-fit regression line was 0.98 and the intercept 0.20 ( $p < 0.0001$ ).

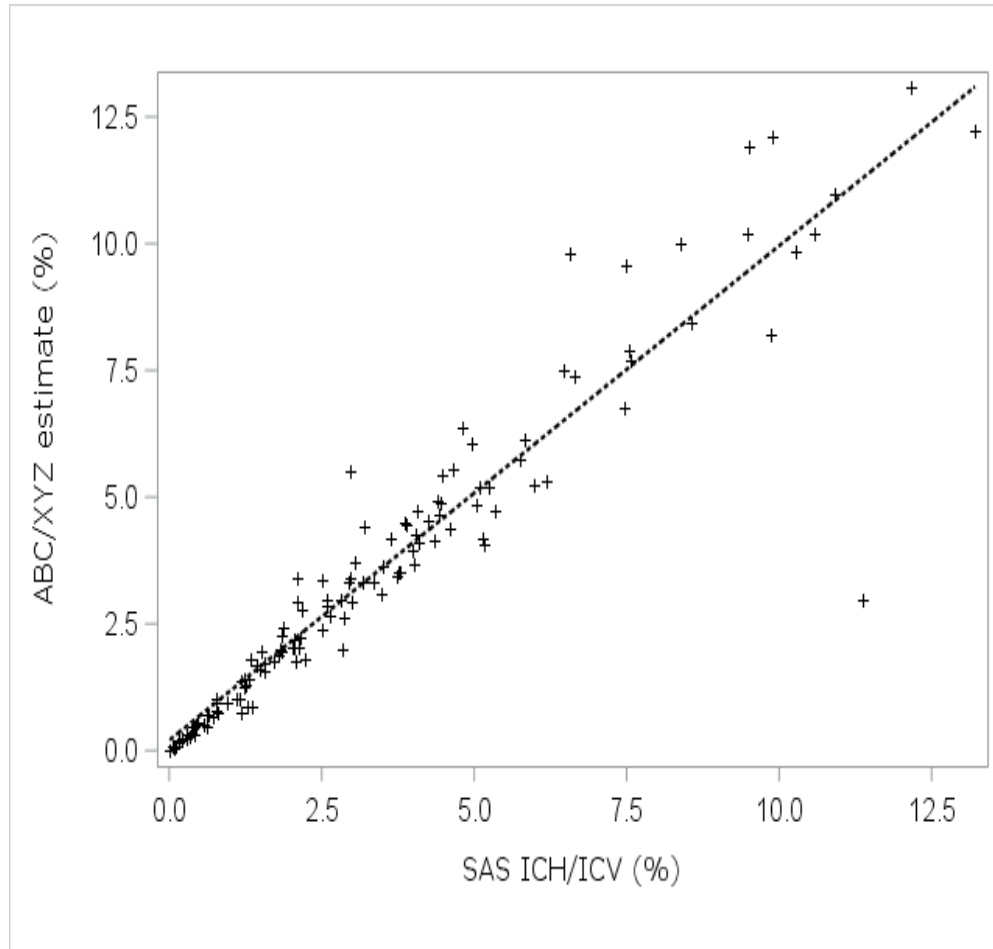

## REFERENCES

1. Krishnan K, Mukhtar SF, Lingard J, et al. Performance characteristics of methods for quantifying spontaneous intracerebral haemorrhage: Data from the efficacy of nitric oxide in stroke (enos) trial. *JNNP*. 2015;86:1258-1266
2. Beslow LA, Ichord RN, Kasner SE, et al. Abc/xyz estimates intracerebral haemorrhage volume as a predictor of total brain volume in children. *Stroke*. 2010;41:691-694
3. Wanifuchi H, Shimizu T, Maruyama T. Age-related changes in the proportion of intracranial cerebrospinal fluid space measured using volumetric computerised scanning. *J Neurosurg*. 2002;97:607-610
4. van Swieten, Hijdra A, van Gijn J. Grading white matter scales on ct and mri: A simple scale. *Journal of Neurology, Neurosurgery and Psychiatry*. 1990;53:1080-1083
5. Diringner MN, Edwards DF, Zazulia AR. Hydrocephalus: A previously unrecognised predictor of poor outcome from supratentorial intracerebral haemorrhage. *Stroke*. 1998;29:1352-1357
6. Kwon SM, Choi K-S, Yi H-J, et al. Impact of brain atrophy on 90-day functional outcome after moderate-volume basal ganglia haemorrhage. *Sci Rep*. 2018;8:4819
